# Supplementary material for: A flexible and low-cost polypropylene pouch for naked-eye detection of herpes simplex viruses
Source: Royal Society of Chemistry journal article supplement (doi:10.1039/c4an01701c), 2014-11-11
Supplement: c4an01701c1.pdf [file c4an01701c1.pdf]

## Supplementary Information (SI)

### A Flexible and Low-cost Polypropylene Pouch for Naked-Eye detection of Herpes Simplex Virus

Sharifun Nahar<sup>a</sup>, Minhaz Uddin Ahmed<sup>b</sup>, Mohammadali Safavieh<sup>a,1</sup>, Annie Rochette<sup>c</sup>, Carla Toro<sup>d</sup>, Mohammed Zourob<sup>d,e\*</sup>

<sup>a</sup>*Institut national de la recherche scientifique, Énergie, Matériaux et Télécommunications (INRS-EMT), Université du Québec, 1650 Boul. Lionel-Boulet, Varennes (Québec) J3X 1S2, Canada*

<sup>b</sup>*Faculty of Science, Universiti Brunei Darussalam, Jalan Tungku Link, Gadong, BE 1410, Brunei Darussalam*

<sup>c</sup>*Institut national de la recherche scientifique-Institut Armand-Frappier (INRS-IAF), Université du Québec, 531 boul. des Prairies, Laval (Québec) H7V 1B7, Canada*

<sup>d</sup>*Center of Biomedical Engineering, Vincent Building, Cranfield University, Bedfordshire MK43 0AL, United Kingdom*

<sup>e</sup> Department of Chemistry, Alfaisal University, Riyadh 11533, Kingdom of Saudi Arabia

*\*Corresponding Author*

Dr. Mohammed Zourob, Center of Biomedical Engineering,  
Vincent Building, Cranfield University, Bedfordshire MK43 0AL,  
United Kingdom. Tel.: +44 1234 758318.  
Email: [m.zourob@cranfield.ac.uk](mailto:m.zourob@cranfield.ac.uk)

Table 1: Primers used for LAMP and their gene location on HSV genome

| Virus | Target Sequence Location                                                                                                                                                                                                                                                                                                                                                                                                                                                                                                                                                                                                                                  | Gene Name | Primer Name                                                                                                                                                | Primer Sequences (5'-3')                                                                                                                                                                                                                                                                                                          |
|-------|-----------------------------------------------------------------------------------------------------------------------------------------------------------------------------------------------------------------------------------------------------------------------------------------------------------------------------------------------------------------------------------------------------------------------------------------------------------------------------------------------------------------------------------------------------------------------------------------------------------------------------------------------------------|-----------|------------------------------------------------------------------------------------------------------------------------------------------------------------|-----------------------------------------------------------------------------------------------------------------------------------------------------------------------------------------------------------------------------------------------------------------------------------------------------------------------------------|
| HSV 1 | <p>Nucleotide position (9721-10080)</p> <p>ATACGCCAGGGCTGGACAGTCGCAAGCAGGCCCGCCAGCCACACACCTGTGAAAGGCTGGG<br/> <b>F3(9756-9773)</b></p> <p>TGTGTGAACCTTTGACTATTCGCGCACCCGCCGCTGTGTAGGGCGACAGGATTTGGACCT<br/> <b>F2(9788-9807) LPF(9810-9833)</b></p> <p><u>ACCAACGGAAACGTCCTGGACGGACCCCGTTCTGCCGCGGACGATGAAGCGGGCCTGCAG</u><br/> <b>F1(9836-9857)</b></p> <p>CCGAAGCCCTCACCACGCCGCCCATCATCGCCACGTCGGACCCACCCCGCGACGG<br/> <b>B1(9926-9945) LPB(9948-9967)</b></p> <p><u>GACGCCGCCACAAAAGCAGACGCCGACGCCACTCCCGGCCCTCTAACGATGCCTC</u><br/> <b>B2(9969-9987) B3(10008-10026)</b></p> <p><u>GACGGAAACCCGTCCGGGTTTCGGGGGCGAACCGGCCCTGTCTCGTCTCAGGGCCGGC</u></p> | UL1       | <p><b>Set A:</b></p> <p>HSV1-F3<br/>           HSV1-B3<br/>           HSV1-FIP<br/>           HSV1-BIP<br/>           HSV1-LPF<br/>           HSV1-LPB</p> | <p>5_-CAGCCACACACCTGTGAA-3_(F3)<br/>           5_-TCCGTCGAGGCATCGTTAG-3_(B3e)<br/>           5_-CCAGACGTTCCGTTGGTAGGTCACCTTTGACTATTCGCGCACCC-3_(F1c-F2)<br/>           5_-CCATCATCGCCACGTCGGACTCGGCGTCTGCTTTTTGTG-3_(B1-B2e)<br/>           5_-AAATCCTGTCCCTACACAGCGG-3_(LPFc)<br/>           5_-CACCCCGCGACGGGACGCCG-3_(LPB)</p> |
| HSV2  | <p>Nucleotide position (138901-139140)</p> <p>CGCCTCAT <u>GGCCTTGACCGAGGACAC</u> <u>GTCCTCCGATTCGCTACGTC</u>CGCTCCGAGAAG<br/> <b>F3(138909-138926) F2(138926-138945)</b></p> <p><u>ACGCCCTCCCTGTGTGTCGGCCACCGCCATGGCACCCCTCAGTCGACCCAAGCGGGAACCG</u><br/> <b>LPF(138961-138980) F1(138984-139004)</b></p> <p>ACCGCCCCGCA<u>ACCACTACTCCCCCGA</u>CGAGATGGCCACACAAGCCGCAACGGTTCGCC<br/> <b>B1(139030-139050) LPB(139053-139072)</b></p> <p><u>GTTACGCCGGAGGAAACGGCAGTCGCCTCCCCGCCGCGACTGCATCCGTGGAGTCGTCG</u><br/> <b>B2(139082-139099) B3(139120-139137)</b></p>                                                                                            | UL5       | <p><b>Set B:</b></p> <p>HSV2-F3<br/>           HSV2-B3<br/>           HSV2-FIP<br/>           HSV2-BIP<br/>           HSV2-LPF<br/>           HSV2-LPB</p> | <p>5_-GGCCTTGACCGAGGACAC-3_(F3)<br/>           5_-CGACTCCACGGATGCAGT-3_(B3e)<br/>           5_-TCGACTGAGGGTGCCATGGCGTCTCCGATTCGCCTACG-3_(F1c-F2)<br/>           5_-GCAACCACTACTCCCCCGACCGTTTCTCCGGCGTAA-3_(B1-B2c)<br/>           5_-GCCGACACAGGGAGGGCGT-3_(LPFc)<br/>           5_-GATGGCCACACAAGCCGCAA-3_(LPB)</p>              |

Table 2: LAMP optimization: time, temp and sensitivity

| <b>Virus</b> | <b>Primers</b>  | <b>Detection time<br/>(amplified at<br/>10',20',30', 40')</b>    | <b>Temperature<br/>(amplified at 10',20',30', 40')</b> | <b>Sensitivity<br/>(Target DNA was diluted 10 folds<br/>from 10 ng/μL-1fg/μL)</b> |
|--------------|-----------------|------------------------------------------------------------------|--------------------------------------------------------|-----------------------------------------------------------------------------------|
| HSV 1        | Set A (Table 1) | Saturation time:<br>50ng/reaction: 20'-40'<br>50fg/reaction: 40' | 60-66°C                                                | 50fg/reaction                                                                     |
| HSV 2        | Set B (Table 1) | Saturation time:<br>50ng/reaction: 30'-40'<br>5fg/reaction: 40'  | 60-63°C                                                | 5fg/reaction                                                                      |
